# $\alpha$ B-Crystallin-coated MAP microtubule resists nocodazole and calcium-induced disassembly

Yoshinobu Fujita<sup>1,\*</sup>, Eri Ohto<sup>1</sup>, Eisaku Katayama<sup>2</sup> and Yoriko Atomi<sup>1,\*‡</sup>

<sup>1</sup>Department of Life Sciences, The Graduate School of Arts and Sciences, The University of Tokyo, 3-8-1, Komaba, Meguro-ku, Tokyo 153-8902, Japan

<sup>2</sup>Division of Biomolecular Imaging, Institute of Medical Science, The University of Tokyo, 4-6-1, Shiroganedai, Minato-ku, Tokyo 108-8639, Japan

\*These authors contributed equally to this work

‡Author for correspondence (e-mail: atomi@idaten.c.u-tokyo.ac.jp)

Accepted 27 November 2003

*Journal of Cell Science* 117, 1719-1726 Published by The Company of Biologists 2004  
doi:10.1242/jcs.01021

## Summary

$\alpha$ B-Crystallin, one of the small heat-shock proteins, is constitutively expressed in various tissues including the lens of the eye. It has been suggested that  $\alpha$ B-crystallin provides lens transparency but its function in nonlenticular tissues is unknown. It has been reported that  $\alpha$ B-crystallin is involved in the stabilization and the regulation of cytoskeleton, such as intermediate filaments and actin. In this study, we investigate the possibility whether  $\alpha$ B-crystallin interacts with the third cytoskeleton component, microtubules (MTs). First, we precisely observed the cellular localization of  $\alpha$ B-crystallin and MT networks in L6E9 myoblast cells and found a striking coincidence between them. MTs reconstituted from cell lysate

contained  $\alpha$ B-crystallin. Electron micrographs clearly showed direct interactions of purified  $\alpha$ B-crystallin with the surface of microtubule-associated proteins (MAPs) attached to MTs. Purified  $\alpha$ B-crystallin bound to MAP-MTs in a concentration-dependent manner. However,  $\alpha$ B-crystallin did not bind MTs reconstituted from purified tubulin. Finally, we observed that  $\alpha$ B-crystallin increased the resistance of MTs to depolymerization in cells and in vitro. Taken together, these results suggest that one of the functions of  $\alpha$ B-crystallin is to bind MTs via MAP(s) and to give the MTs resistance to disassembly.

Key words: Tubulin, sHSP, Cytoskeleton, Chaperone

## Introduction

$\alpha$ B-Crystallin, one of the small heat-shock proteins (sHSPs), is constitutively expressed in heart, skeletal muscle, kidney and brain (Dubin et al., 1989), as well as in lens. It has an approximate molecular mass of 22 kDa and exists as a large, oligomeric complex of approximately 200-800 kDa in the native state (Bloemendal, 1977). The complex is composed of a globular oligomer, and denatured proteins bind to the molecular surface (Haley et al., 1998) and the central region of the complex (Boyle and Takemoto, 1994). The structure of  $\alpha$ B-crystallin is thought to have three domains – the N-terminal hydrophobic domain, the conserved C-terminal ‘ $\alpha$ -crystallin domain’ and an exposed, flexible C-terminal extension (Quax-Jeuken et al., 1985).

In lens,  $\alpha$ B-crystallin prevents other lens crystallins from ultraviolet-induced aggregation (Lee et al., 1998), suggesting that  $\alpha$ B-crystallin might provide lens transparency. However, the function of  $\alpha$ B-crystallin in nonlenticular tissues is unknown. There are some tissues in which the expression level of  $\alpha$ B-crystallin is higher in unstressed conditions than those of heat-shocked NIH3T3 cells (Klemenz et al., 1993), so  $\alpha$ B-crystallin might have a special role in these tissues. It has been reported that  $\alpha$ B-crystallin is involved in the stabilization and the regulation of cytoskeletal proteins, such as actin in C6 glioma cells (Iwaki et al., 1994) and in vitro (Wang and Spector, 1996), vimentin in NIH3T3 fibroblast cells and lens tissue (Djabali et al., 1997; Nicholl and Quinlan, 1994), glial fiber acidic protein in lens and U373MG astrocytoma cells (Nicholl and Quinlan, 1994; Perng et al., 1999), desmin in

skeletal muscle (Vicart et al., 1998), and tubulin in L6E9 myoblast cells and in vitro (Arai and Atomi, 1997). Previously, we have identified  $\alpha$ B-crystallin as a protein that specifically decreased in atrophied soleus (slow tonic muscle) (Atomi et al., 1991a). It localized around Z-bands (Atomi et al., 1991b), which consist of cytoskeletal proteins receiving tension against muscle contraction (Danowski et al., 1992).

The three cytoskeleton components, fibrous actin, microtubules (MTs) and intermediate filaments (IFs), are basically independently regulated, but affect each other with different tensile and dynamic properties via interacting proteins. Co-localization of IF and MT networks has been reported in various cells (Gyoeva and Gelfand, 1991). In fact, some specific proteins have been identified that connect actin and MTs (Karakesisoglou et al., 2000; Leung et al., 1999), or MTs and IFs (Liao and Gundersen, 1998). It has been suggested that MT depolymerization is induced by actomyosin contraction of stress fibers in cultured cells (Waterman-Storer and Salmon, 1997). This might happen in a similar way to tonic contraction in heart and slow muscle.

MTs have various functions, such as keeping the shape of cell and supplying tracts for translocation of various molecules and organelles in cells, including subunits of the tubulin dimer itself (Terada et al., 2000). MTs have intrinsic dynamic properties, called dynamic instability (Kirschner, 1980; Mitchison and Kirschner, 1984), and de novo tubulin synthesis is autoregulated by free tubulin dimer concentrations (Pachter et al., 1987; Yen et al., 1988). Unassembled tubulin denatures relatively easily and the denatured tubulin can even inhibit the

assembly itself (Maccioni, 1983).  $\alpha$ B-Crystallin can suppress the aggregation and precipitation of denatured tubulin in vitro (Arai and Atomi, 1997). Interestingly, the levels of both mRNA and protein of  $\alpha$ B-crystallin increased upon treatment with MT-destabilizing drugs such as colchicine, colcemid, vinblastine and nocodazole, whereas they decreased with the MT-stabilizing drug Taxol (Kato et al., 1996). These results suggest that increased free tubulin dimers might be a substrate of  $\alpha$ B-crystallin. Tailless complex polypeptide 1 (TCP1) ring complex (TRiC) is a chaperone system for newly synthesized actin and tubulin (Yaffe et al., 1992). However, the cytoskeleton might need another chaperone system for refolding denatured monomers, helping to degrade them and to maintain their intrinsic dynamic properties (Quinlan, 2002). This last possibility might lead to a specific interaction of  $\alpha$ B-crystallin with proteasome machinery (Boelens et al., 2001).

In this study, we aimed to investigate the possibility whether  $\alpha$ B-crystallin interacts with MT. We demonstrate biochemical and cytological associations of  $\alpha$ B-crystallin with MTs mediated by MT-associated protein(s) [MAP(s)], and this interaction gives MTs resistance to disassembly, both in cells and in vitro. This is the first demonstration of the colocalization of  $\alpha$ B-crystallin with MTs in unstressed cells. These results demonstrate how to study the function of sHSPs in nonlenticular tissues that express sHSPs constitutively.

## Materials and Methods

### Materials

Bovine serum albumin (BSA), EGTA, PIPES, GTP and anti- $\alpha$ -tubulin monoclonal antibodies were purchased from Sigma Chemical (St Louis, MO). Fetal bovine serum (FBS) was purchased from Dainippon Pharmaceutical (Osaka, Japan). Porcine brain and bovine lens were from a local slaughterhouse. All other chemicals were purchased from Wako Pure Chemical Industries (Osaka, Japan). All reagents were of the highest grade.

### Preparation of antibodies

Antibodies C1 and N1 were raised against the C-terminal [(SH)KPAVTAAPKK] and N-terminal [Ac-MDIAIHHPWIC(SH)] peptides of rat  $\alpha$ B-crystallin (provided by S. Aimoto, Osaka University, Japan) and conjugated to BSA with *m*-maleimidobenzoyl-*N*-hydroxysuccinimide ester (MBS) (Arai and Atomi, 1997). The immunoglobulins were purified by C- or N-terminal peptide-conjugated affinity chromatography using an MBS linker (Pierce) and EAH Sepharose-4B (Pharmacia Biotech, Shinagawa, Japan).

### Cell culture

L6E9 rat myoblast cells (generous gift from T. Endo, Chiba University, Japan) were cultured in Dulbecco's modified Eagle's medium (DMEM) supplemented with 10% FBS. C6 normal,  $\alpha$ B-crystallin sense cDNA transformant (C6SE) and antisense cDNA transformant (C6AS) rat glioma cells (Iwaki et al., 1994), a generous gift from A. Iwaki (Kyushu University, Japan), were cultured in F10 medium supplemented with 10% FBS. For microscopic assays, the cells were cultured on glass cover slips in culture dishes.

### Protein purification

$\alpha$ B-Crystallin was purified from bovine lens using ion-exchange chromatography in the presence of urea, as previously described (de Jong et al., 1976). Tubulin was purified by the method of Shelanski

et al. (Shelanski et al., 1973), with slight modifications. Porcine brain was homogenized with an equal volume of PME (80 mM PIPES, 1 mM  $\text{MgCl}_2$ , 1 mM EGTA, pH 6.8). The polymerization-depolymerization cycle was repeated twice. At this step, the obtained material (MT proteins; MTP) contained MAPs. To eliminate MAPs from the MTP, further purification was performed using phosphocellulose column chromatography (Weingarten et al., 1975). Protein concentration was determined with Bradford Protein Assay kit (Bio-Rad, Hercules, CA) using BSA as the standard.

### SDS-PAGE and immunoblotting

Sodium-dodecyl-sulfate polyacrylamide gel electrophoresis (SDS-PAGE) and immunoblotting were performed as previously described (Arai and Atomi, 1997; Atomi et al., 1991b). The C1 and N1 antibodies were generally used at 1:5000 and 1:1000 dilutions, respectively. Immunoblots were visualized by the use of an Enhanced Chemiluminescence (ECL) kit (Amersham International, Amersham, UK). Developed immunoblots and Coomassie Brilliant Blue (CBB) stained gel bands were scanned into a computer using a CCD camera (ATTO Corporation, Tokyo, Japan). Obtained band intensity was quantified using NIH Image.

### Immunofluorescence study

Cells were briefly washed with warmed PBS at 37°C and fixed either by incubation at room temperature in pre-warmed (at 37°C) FME (4% formaldehyde, 2 mM  $\text{MgCl}_2$  and 5 mM EGTA in PBS) or by dipping in methanol at -20°C for 10 minutes. In the case of FME fixation, cells were washed several times with PBS and permeabilized with FME containing 0.3% Triton X-100 (FMET) for 10 minutes at room temperature. Both FMET- and methanol-fixed cells were washed several times with PBS and kept in PBS containing 1% BSA and 0.02% sodium azide. Cells were immunohistochemically stained with anti- $\alpha$ -tubulin monoclonal antibodies. Subsequently, cells were stained with rhodamine-conjugated anti-mouse IgG as a secondary antibody. Subsequently, cells were stained with C1 antibody as a primary antibody and fluorescein isothiocyanate (FITC)-conjugated goat anti-rabbit IgG as a secondary antibody. All photographs, including color images of double-labeled specimens, were taken using an LSM410 confocal microscope (Carl Zeiss, Oberkochen, Germany). Adobe Photoshop 7.0 was used for pseudocoloration and merging of the images.

### MT assembly

The isolation of MTs from the cell lysate was carried out as previously described (Vallee, 1982). Briefly, L6E9 cells were homogenized with PME buffer at 4°C, followed by centrifugation at 30,000 *g* for 15 minutes and 100,000 *g* for 60 minutes at 4°C. Taxol (20  $\mu\text{M}$ ) and GTP (1 mM) were added to the supernatants. After incubation for 15 minutes at 37°C, the supernatant was centrifuged at 37°C for 15 minutes to pellet MTs. Fractions were analysed by immunoblotting with C1 antibody.

### Co-precipitation assay

MTP (1 mg  $\text{ml}^{-1}$ ) was polymerized at 37°C for 10 minutes in PME containing 1 mM GTP and incubated with 10  $\mu\text{M}$  Taxol for another 5 minutes. Phosphocellulose column purified tubulin (PCT) (10  $\mu\text{M}$ ) was polymerized in the same manner except that 10% DMSO was used to initiate polymerization. Then, polymerized MTs were added to various concentrations of  $\alpha$ B-crystallin and allowed to incubate for another 15 minutes at 37°C. The solution was overlaid onto 10% sucrose in PME and centrifuged at 30,000 *g* for 15 minutes at 37°C. The precipitate was subjected to SDS-PAGE. Controls containing MTs or  $\alpha$ B-crystallin alone were centrifuged under the same conditions.

### Electron microscopy

MAP-MTs polymerized with or without  $\alpha$ B-crystallin as described above were incubated and then diluted 20-fold with phosphate buffer (5 mM sodium phosphate, 1 mM EGTA, 1 mM  $\text{MgCl}_2$ , pH 6.8) containing Taxol (10  $\mu\text{M}$ ) and GTP (1 mM). Those samples were placed on uncoated copper grids and stained in 1% uranyl acetate containing bacitracin (Katayama, 1989). Samples were observed with a JEOL 2000ES electron microscope at an accelerating voltage of 80 keV.

### Effects of nocodazole on MTs remaining in cells

C6 normal, C6SE and C6AS glioma cells were used in these experiments. In order to examine the suppressive effects of  $\alpha$ B-crystallin on nocodazole-induced MT depolymerization, C6 normal, C6SE and C6AS cells were treated with nocodazole (33  $\mu\text{M}$ ) at various times. At a given time, the cells were processed by the extraction of free tubulin with MT-stabilizing buffer (MSB) (0.1 M PIPES, pH 6.8, 1 mM  $\text{MgCl}_2$ , 1 mM EGTA, 2 M glycerol) supplemented with 0.5% Triton X-100 for 1 minute at 37°C. After that, the cells were fixed with FMET for immunofluorescent study or otherwise analysed biochemically as described below. MTs remaining with the experimental cells were compared by means of immunostaining using anti- $\alpha$ -tubulin antibody as described below.

Dimer and polymer fractions of tubulin were prepared from nocodazole (33  $\mu\text{M}$ ) treated cells, according to a previous report (Gundersen et al., 1987) with slight modifications. C6 normal and C6AS cells on plastic Petri dishes were rapidly rinsed twice in MSB containing 4  $\mu\text{g ml}^{-1}$  aprotinin and 0.2 mM phenylmethylsulfonyl fluoride, then extracted in MSB containing 0.5% (vol/vol) Triton X-100 for 2 minutes. The Triton X-100 extract (dimer fraction) was gently transferred to a tube and the volume was measured. The cytoskeleton polymers in those cells remaining on the plate were carefully rinsed once with MSB, solubilized into SDS sample buffer and then the volume was measured. All procedures were performed at 37°C. Samples stored at -80°C were analysed by immunoblotting using anti- $\alpha$ -tubulin antibody. Obtained band intensity was corrected by measured volume.

### Effects of $\alpha$ B-crystallin on depolymerization of MTs in vitro

Assembly of MTP, with or without  $\alpha$ B-crystallin, in PME containing 1 mM GTP at 37°C was monitored by recording turbidity at 350 nm, using Beckman DU-65 spectrophotometer. After a 15 minute polymerization, 10  $\mu\text{M}$  podophyllotoxin or  $\text{CaCl}_2$  (113  $\mu\text{M}$  or 1 mM) was added. The final concentration of free calcium ions was calculated using an apparent binding constant of EGTA for calcium. The amount of the remaining MTs was estimated by turbidity and calculated as the percentage of the mean value of the last 1 minute to that of 14-15 minutes.

## Results

### Association of $\alpha$ B-crystallin with MT in vivo

To observe cellular localization of  $\alpha$ B-crystallin precisely, specific antibodies were produced. Polyclonal antibodies (C1 and N1) against the C- and N-terminal 10 amino acid peptides of rat  $\alpha$ B-crystallin specifically reacted to the 22 kDa protein ( $\alpha$ B-crystallin) of rat skeletal muscle (Fig. 1A). The C1 antibody was mainly used for immunofluorescence studies because of its clear labeling of distinct localization patterns of  $\alpha$ B-crystallin associated with cytoskeletal networks. C1 antibody preadsorbed to the C-terminal peptide did not react with  $\alpha$ B-crystallin in L6E9 cells (Fig. 1B).

We examined the co-localization of  $\alpha$ B-crystallin and MT networks in widely extended L6E9 myoblast cells during

interphase. After FMET fixation, cells were stained using anti- $\alpha$ -tubulin antibody for tubulin and MT (Fig. 2A, middle) and anti- $\alpha$ B-crystallin C1 antibody for  $\alpha$ B-crystallin (Fig. 2A, left). Intriguingly, from the merged image (Fig. 2A, right),  $\alpha$ B-crystallin and MTs appeared to co-localize in L6E9 cells, even in fine filaments (Fig. 2A, inset). However, it seemed that  $\alpha$ B-crystallin and free tubulin remained slightly in FME fixed cells. To eliminate these proteins completely, a methanol fixation method was used that is known to extract cytoplasmic proteins more appropriately. After methanol fixation, cells were stained in the same manner (Fig. 2B). The merged image clearly showed that  $\alpha$ B-crystallin co-localized with the MT network with complete agreement, even on fine filaments (Fig. 2B, inset). The pretreatment of cells with Taxol resulted in a complete consistent merged network (data not shown). Even pre-extraction of the Taxol-treated cells with Triton X-100 did not abolish the association of  $\alpha$ B-crystallin with MTs (data not shown). This is the first demonstration of the colocalization of  $\alpha$ B-crystallin with MTs in unstressed cells.

The biochemical association of  $\alpha$ B-crystallin with the MTs was examined by the employment of a Taxol-dependent MT

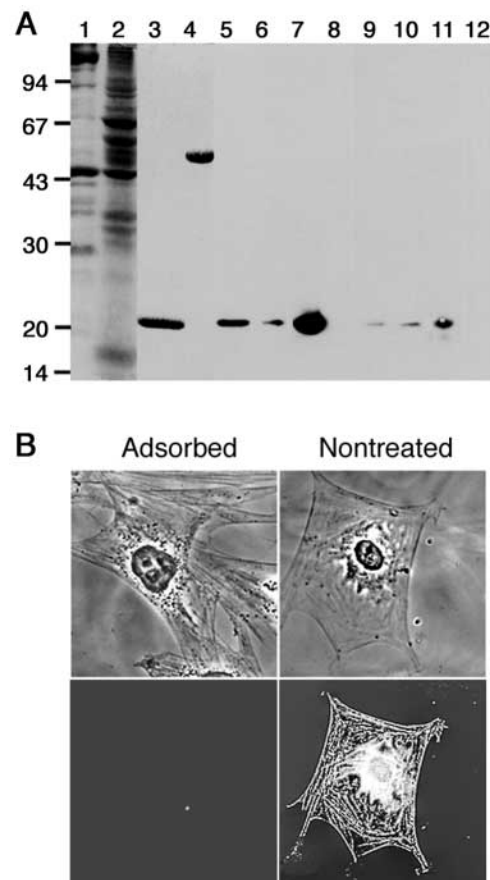

**Fig. 1.** Characterization of anti- $\alpha$ B-crystallin C-terminal (C1) and N-terminal (N1) peptide antibodies. (A) Coomassie-blue-stained gels of rat soleus muscle homogenate (lane 1), total L6E9 cell lysate (lane 2), purified  $\alpha$ B-crystallin (lane 3) and tubulin (lane 4), and immunoblots with C1 antibody (lanes 5-8; corresponding to lanes 1-4) and N1 antibody (lanes 9-12; corresponding to lanes 1-4). (B) C1 antibody recognizes  $\alpha$ B-crystallin in L6E9 cells (bottom right) as confirmed by a loss of reaction it after preadsorption of the antibody with the C-terminal peptide (bottom left). Scale bar, 25  $\mu\text{m}$ .



assembly procedure (Vallee, 1982). Taxol and GTP were added to L6E9 cell lysates and the MTs were pelleted by centrifugation (Fig. 2CI, lane 3). Without Taxol, MT did not polymerize and  $\alpha$ B-crystallin was not precipitated in those fractions (data not shown). Immunoblotting using anti- $\alpha$ B-crystallin C1 antibody indicated the presence of  $\alpha$ B-crystallin in the MT fraction (Fig. 2CII, lane 3). Together with the immunofluorescence study, it is clear that  $\alpha$ B-crystallin is associated with MTs in L6E9 cells.

#### Association of $\alpha$ B-crystallin with MAP-MTs but hardly with PCT-MTs in vitro

To investigate this interaction more precisely, we employed electron microscopic observation using purified bovine  $\alpha$ B-crystallin and MTs reconstituted from porcine MTP. After mixing,  $\alpha$ B-crystallin and MTP polymerized at the ratio of 4:1 calculated as  $\alpha$ B-crystallin monomer and tubulin dimer, respectively. The electron micrograph clearly showed  $\alpha$ B-crystallin-bound MAPs-MTs (Fig. 3). However,  $\alpha$ B-crystallin hardly bound to PCT-MTs (data not shown).  $\alpha$ B-Crystallin exists as assembled oligomers (Haley et al., 1998; Nicholl and Quinlan, 1994) (Fig. 3A, arrowheads), which binds to MAP-

MTs.  $\alpha$ B-crystallin with a 12 nm diameter bound to 8-10 nm spaced MAP-MTs (Fig. 3B, top).

To investigate this interaction more stoichiometrically, we added various concentrations (2.5-80  $\mu$ M) of  $\alpha$ B-crystallin to Taxol-stabilized MTP-MTs and incubated them at 37°C for 15 minutes. Reaction mixtures were centrifuged and the pellets were electrophoresed and CBB stained.  $\alpha$ B-Crystallin precipitated with the MTs (Fig. 4A, lanes 2-7) in a dose-dependent manner. Next, we investigated whether this interaction of  $\alpha$ B-crystallin with MTs was direct to the tubulin component of MTs. We reconstituted MTs from PCT which eliminated MAPs from MTP. Various concentrations (0.5-80  $\mu$ M) of  $\alpha$ B-crystallin were added to PCT-MTs and incubated at 37°C for 15 minutes. Reaction mixtures were centrifuged, the pellets electrophoresed and the gel CBB stained (Fig. 4B, lanes 2-6). Under the same buffer conditions containing  $\alpha$ B-crystallin alone, only the small amount was precipitated (data not shown). The band intensity of  $\alpha$ B-crystallin alone was subtracted from that of  $\alpha$ B-crystallin with MAP-MTs or PCT-MTs. The amount of bound  $\alpha$ B-crystallin was calculated using purified  $\alpha$ B-crystallin as standards and plotted on a graph (Fig. 4C). The correlation coefficient with natural logarithmic curve fitting was 0.995 for MTP-MTs and 0.091 for PCT-MTs. We concluded that  $\alpha$ B-crystallin did not bind directly to tubulin in MTs.

#### Instability of MTs in C6AS cells

The next question was whether this interaction influences MT polymerization and/or depolymerization. To examine this, C6 glioma cells transformed with a sense or an antisense strand of  $\alpha$ B-crystallin cDNA were used (Iwaki et al., 1994), denoted as C6SE and C6AS cells, respectively. We observed the colocalization of  $\alpha$ B-crystallin with MT networks in C6 glioma cells (Fig. 5A), even after a brief treatment with Triton X-100 in MSB followed by FMET fixation, which results in the extraction of free tubulin dimer.  $\alpha$ B-Crystallin localized with the MTs in C6 normal cells, as in L6 cells, and also in C6SE and C6AS cells (data not shown).  $\alpha$ B-Crystallin production in those cells was compared by western blotting using C1 antibody (Fig. 5B). C6SE and C6 normal cells expressed about five- to tenfold and two- to threefold more  $\alpha$ B-crystallin, respectively, than C6AS cells. Next, we examined the effect of the difference in cellular amount of  $\alpha$ B-crystallin on MT depolymerization by nocodazole. MT stability against (33  $\mu$ M) nocodazole-induced depolymerization was clearly maintained at 2 minutes and 10 minutes in C6SE cells, and at 2

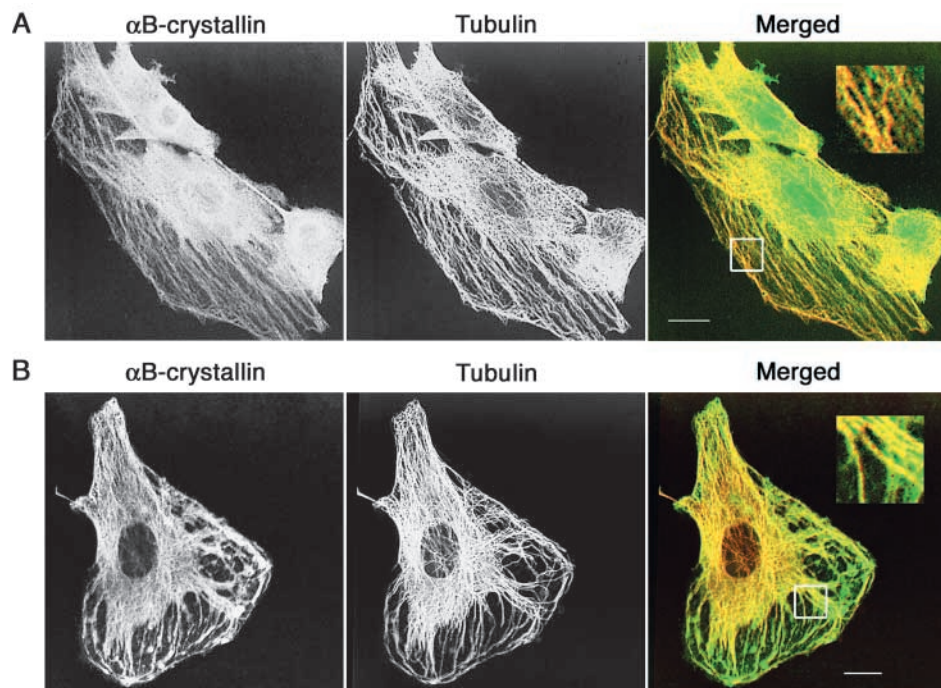

**Fig. 2.** Association of  $\alpha$ B-crystallin with MTs. (A) Co-localization of  $\alpha$ B-crystallin and MTs in formaldehyde fixed L6E9 cells. (B) Co-localization of  $\alpha$ B-crystallin and MT in methanol fixed L6E9 cells. (A,B) Merged immunofluorescence micrographs (right) of the same cells visualized for  $\alpha$ B-crystallin (left) and tubulin (middle). Insets show an enlargement (threefold) of the boxed area in the right-hand panels. (C) Co-precipitations of  $\alpha$ B-crystallin and reconstituted MTs from L6E9 cell lysate. SDS-PAGE of total proteins (lane 1), the supernatant (lane 2), the precipitate (lane 3) in I and their immunoblots with the C1 antibody in II. Scale bars, 10  $\mu$ m.

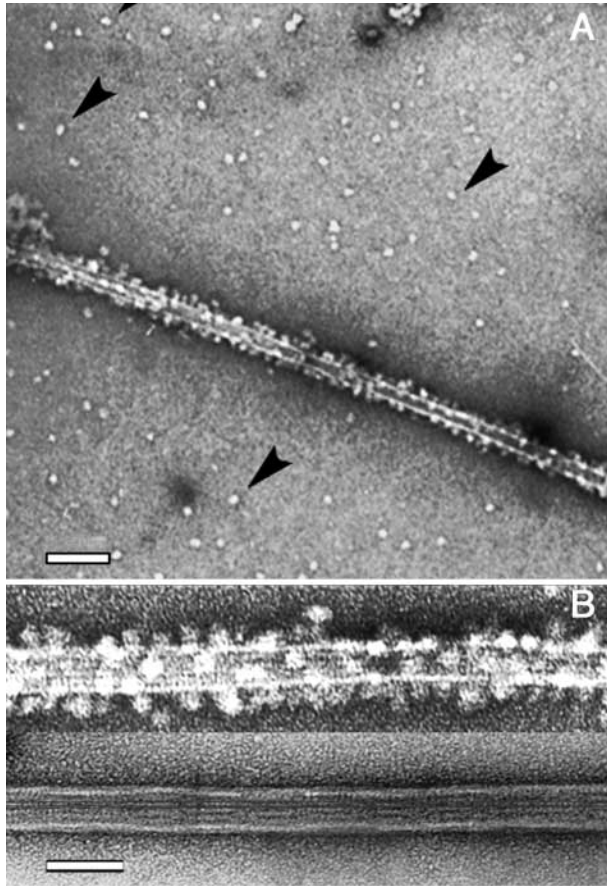

**Fig. 3.** Electron micrographs of  $\alpha$ B-crystallin bound MAP-MTs. MTs polymerized in the presence (A; B, top) or absence of  $\alpha$ B-crystallin (B, bottom) as observed by electron microscopy. MTP (1 mg ml<sup>-1</sup>) was polymerized in the presence of  $\alpha$ B-crystallin (40  $\mu$ M as monomer). Arrowheads indicate unbound  $\alpha$ B-crystallin. Scale bar, 100 nm (A), 50 nm (B).

minutes in C6 normal cells. By contrast, MT depolymerization was observed in C6AS cells at 2 minutes (Fig. 5C). Moreover, at 2 minutes and 10 minutes in C6AS cells, and at 10 minutes in C6 normal cells, unextracted tubulin was observed as white background, which was stained with anti- $\alpha$ -tubulin antibody, even after the treatment of Triton X-100.

To investigate this MT-stabilizing effect of  $\alpha$ B-crystallin more quantitatively, dimer and polymer fractions of tubulin were separated from (33  $\mu$ M) nocodazole-treated cells and evaluated by immunoblotting (Fig. 5D). To separate the dimer and polymer, we followed a protocol described by Gundersen et al. (Gundersen et al., 1987), in which cells were extracted with Triton X-100 in a MT-stabilization buffer. Polymer ratios of C6AS cells after nocodazole treatment for 15 minutes (31.8 $\pm$ 6.4%: mean $\pm$ s.d.) and 30 minutes (18.6 $\pm$ 9.8%) were significantly lower than those of C6 normal cells (48.9 $\pm$ 11.5% and 36.9 $\pm$ 9.1%, respectively) (Fig. 5E).

#### Resistance to MT disassembly in vitro

We also examined the effects of  $\alpha$ B-crystallin on assembly modifications by podophyllotoxin (another MT-depolymerizing drug) or calcium [which is reported to increase

dynamic instability in vitro (O'Brien et al., 1997) and is thought to induce depolymerization in vivo]. MTP, together with various concentrations of  $\alpha$ B-crystallin, was allowed to polymerize for 15 minutes and then 10  $\mu$ M podophyllotoxin was added to the solution. The changes in turbidity at 350 nm were monitored (Fig. 6A). The amount of MT remaining was estimated from the ratio of the mean turbidity at 44–45 minutes to that at 14–15 minutes (Fig. 6B). Without  $\alpha$ B-crystallin, the MT fraction was 71.6 $\pm$ 6.6% (mean $\pm$ s.d.); with 2.5  $\mu$ M and 10  $\mu$ M  $\alpha$ B-crystallin, the MT fractions were 89.4 $\pm$ 8.4% and 93.4 $\pm$ 6.6%, respectively. The stabilizing effect of  $\alpha$ B-crystallin inhibiting depolymerization of MTs by podophyllotoxin was concentration dependent, and the ratio in the presence of 10  $\mu$ M  $\alpha$ B-crystallin was significantly higher than that in the absence of  $\alpha$ B-crystallin ( $n=3$ , \* $P<0.05$ ).

The MT-resisting effect of  $\alpha$ B-crystallin against calcium was examined. MTP was polymerized in PME as described above.  $\alpha$ B-Crystallin suppressed 1 mM free-calcium-induced MT depolymerization in a concentration-dependent manner (Fig. 6C). The polymerized level attained after the addition of 113  $\mu$ M free calcium with  $\alpha$ B-crystallin (10  $\mu$ M) was significantly higher than that without  $\alpha$ B-crystallin (Fig. 6D,  $n=6$ , \*\* $P<0.01$ ). The effects of  $\alpha$ B-crystallin on the properties of MAPs, such as MT nucleation activity, were examined and  $\alpha$ B-crystallin found to have no assembly-promoting activity (data not shown). However, the plateau level of polymerization of MTs with  $\alpha$ B-crystallin was slightly higher in any concentration of  $\alpha$ B-crystallin tested (see also Fig. 6A).

#### Discussion

The present study is the first demonstration of the interaction of  $\alpha$ B-crystallin with MTs, both in vivo and in vitro in the absence of stress or normal condition.  $\alpha$ B-Crystallin localized with MT networks in myoblast and glioma cells, and precipitated with MTs polymerized from myoblast cell extracts. Electron micrographs presented in this report clearly show this interaction. Co-precipitation assay revealed that the amount of bound  $\alpha$ B-crystallin with reconstituted MTs from MTP was dose dependent. However, this interaction was not observed using MTs reconstituted from PCT. It was suggested that this interaction was mediated by MAP(s), because MTP contained MAPs. MAPs are proteins that bind along the side of MTs and can stabilize them against disassembly (Maccioni and Cambiazo, 1995). Recently, it was suggested that HSP70 and HSP90, both of which have been well characterized as molecular chaperones, can bind tau protein, one of the MAPs, and refold it (Dou et al., 2003). It has been reported that  $\alpha$ B-crystallin localized with neurofibrillary tangles, which contain amyloid  $\beta$  and tau in Alzheimer's-disease-patient brain (Cooper et al., 1995; Lowe et al., 1990; Lowe et al., 1992). Together, these results and this study suggest that there is a possibility that  $\alpha$ B-crystallin also binds tau. However, what component in MTP might interact with  $\alpha$ B-crystallin is to be elucidated in future.

These results remind us of a hypothesis (Carver et al., 2002) to explain the ability of sHSPs to protect other proteins from denaturation: that the oligomer form of sHSP can supply interactive sites for the substrates on the surface of the spheres of sHSPs. It might be that the surface of  $\alpha$ B-crystallin oligomers, when attached to MTs by MAPs, is accessible as a



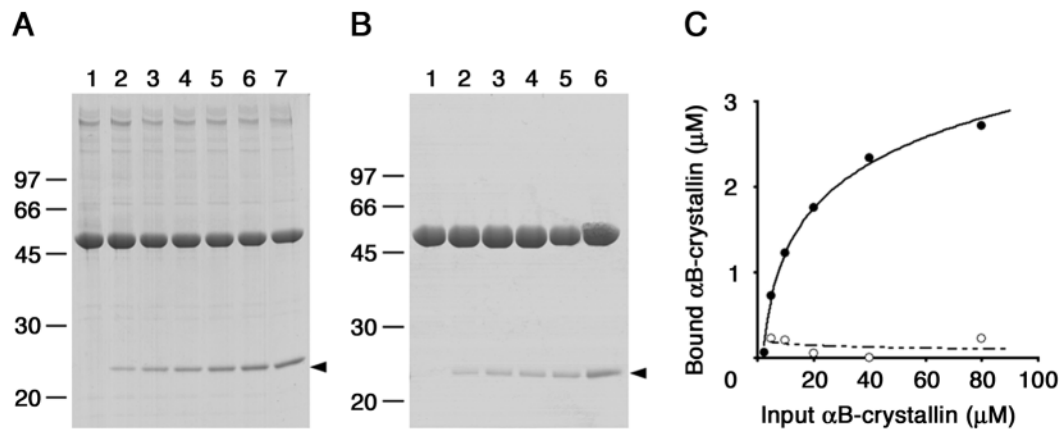

**Fig. 4.** Binding of  $\alpha$ B-crystallin to reconstituted MTs. (A) CBB-stained gel of co-precipitated  $\alpha$ B-crystallin and MAP-MTs. All lanes contain  $1 \text{ mg ml}^{-1}$  MAP-MTs. The other lanes also contain:  $2.5 \text{ } \mu\text{M}$   $\alpha$ B-crystallin (lane 2);  $5 \text{ } \mu\text{M}$   $\alpha$ B-crystallin (lane 3);  $10 \text{ } \mu\text{M}$   $\alpha$ B-crystallin (lane 4);  $20 \text{ } \mu\text{M}$   $\alpha$ B-crystallin (lane 5);  $40 \text{ } \mu\text{M}$   $\alpha$ B-crystallin (lane 6);  $80 \text{ } \mu\text{M}$   $\alpha$ B-crystallin (lane 7). Arrowhead indicates  $\alpha$ B-crystallin band. (B) CBB-stained gel of co-precipitated  $\alpha$ B-crystallin and PCT-MT. All lanes contain  $10 \text{ } \mu\text{M}$  PCT-MT. The other lanes also contain:  $5 \text{ } \mu\text{M}$   $\alpha$ B-crystallin (lane 2);  $10 \text{ } \mu\text{M}$   $\alpha$ B-crystallin (lane 3);  $20 \text{ } \mu\text{M}$   $\alpha$ B-crystallin (lane 4);  $40 \text{ } \mu\text{M}$   $\alpha$ B-crystallin (lane 5) and  $80 \text{ } \mu\text{M}$   $\alpha$ B-crystallin (lane 6). (C) The amount of co-precipitated  $\alpha$ B-crystallin was plotted for input  $\alpha$ B-crystallin. Closed circle represented for MTP-MTs and open circle for PCT-MTs.

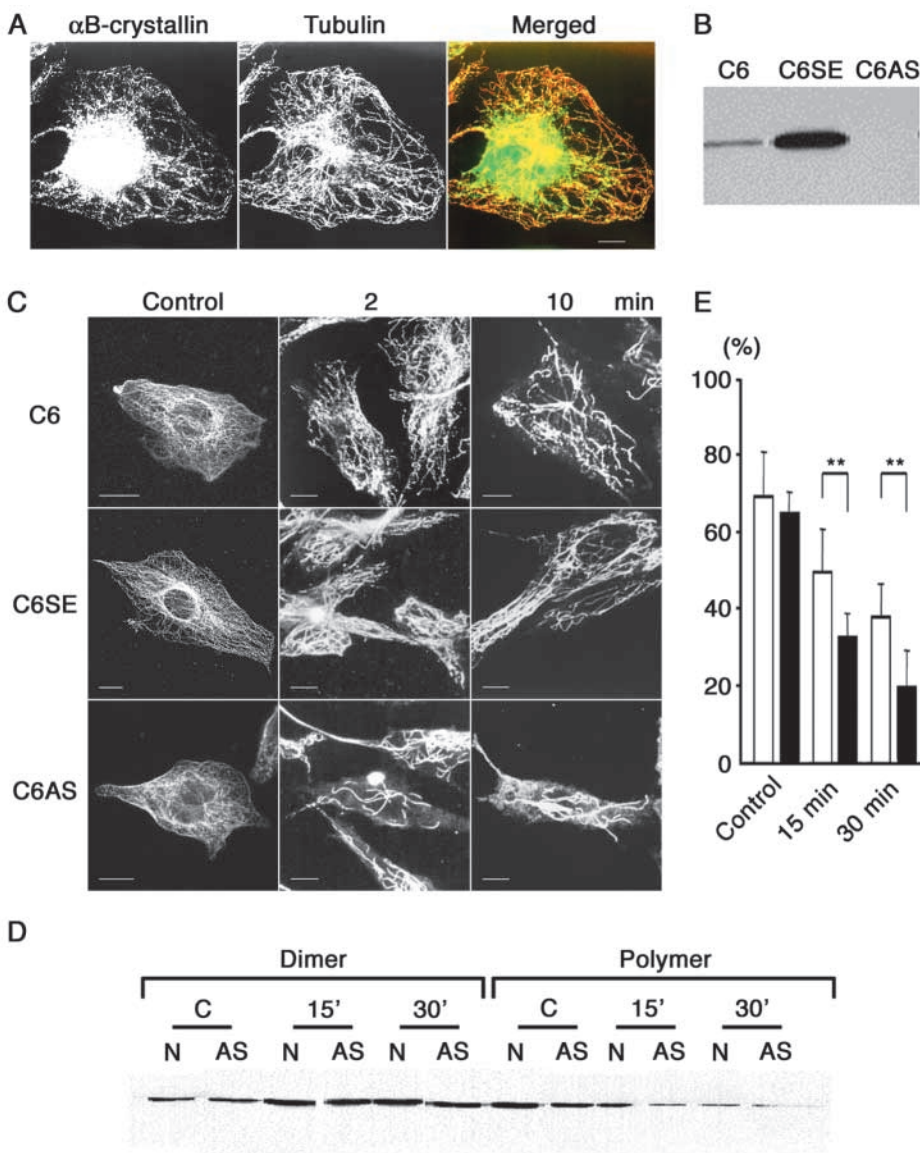

**Fig. 5.** Instability of MT in C6AS cell. (A) Co-localization of  $\alpha$ B-crystallin and MTs in C6 glioma cells. Merged immunofluorescence micrographs of C6 glioma cells (right), visualized for  $\alpha$ B-crystallin (left) and tubulin (middle), permeabilized with MSB containing Triton X-100 first and fixed later. Scale bar,  $10 \text{ } \mu\text{m}$ . (B) The expression levels of  $\alpha$ B-crystallin in C6 normal, C6SE and C6AS glioma cells by western blotting. (C) Comparisons of the MTs remaining at 2 minutes and 10 minutes after nocodazole treatment ( $33 \text{ } \mu\text{M}$ ) in C6 normal, C6SE and C6AS cells immunostained with anti- $\alpha$ -tubulin antibody. Scale bars,  $10 \text{ } \mu\text{m}$ . (D) The immunoblot of tubulin isolated as dimers (lanes 1-6) or polymers (lanes 7-12) from C6 (odd numbers) and C6AS (even numbers). Tubulin from untreated cells (control; lanes 1, 2, 7 and 8) and treated with nocodazole for 15 minutes (lanes 3, 4, 9 and 10) and 30 minutes (lanes 5, 6, 11, and 12) were visualized after staining with anti- $\alpha$ -tubulin antibody. (E) The comparisons in the polymer ratio to the amount of total tubulin, as quantified by immunoblotting of the isolated dimers and polymers with (for 15 minutes and 30 minutes) and without (control) nocodazole treatment, between C6 and C6AS cells. The mean polymer ratio and the standard deviations in six samples are shown for C6 cells (white columns) and  $\alpha$ B-crystallin-antisense-expressing C6AS cells (black columns). \*\*Significantly different at  $P < 0.01$ .

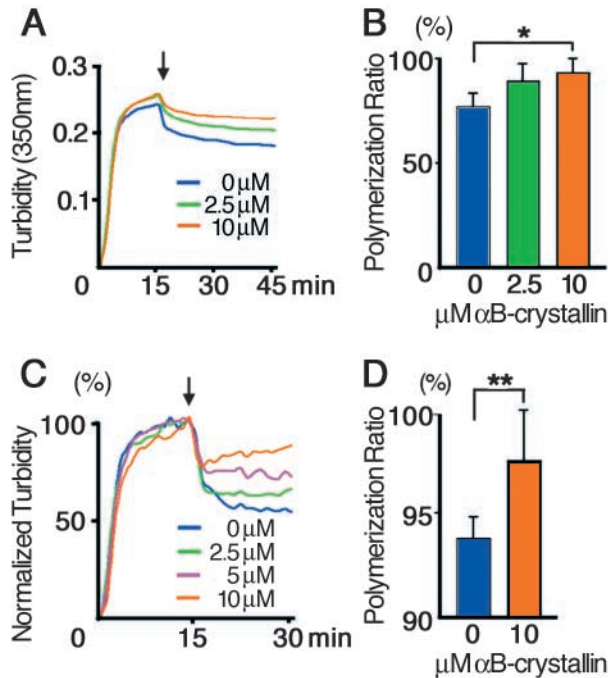

**Fig. 6.**  $\alpha$ B-Crystallin increases MT resistance to disassembly in vitro. (A) Changes of turbidity in assembly of MT proteins, over 15 minutes and disassembly after the addition of 10  $\mu$ M podophyllotoxin (indicated by arrow) with (2.5  $\mu$ M, 10  $\mu$ M) or without  $\alpha$ B-crystallin. (B) Mean levels of remaining MTs and standard deviations for each of three trials calculated from the ratio of the absorbance at 44–45 minutes to the level at 14–15 minutes (at polymerized peak) with different levels of  $\alpha$ B-crystallin.  $\alpha$ B-Crystallin (10  $\mu$ M) significantly increased the amount of remaining MT compared with that in the absence of  $\alpha$ B-crystallin. Values are means  $\pm$  s.d. ( $n=3$ , \*significantly different at  $P<0.05$ ). (C) Changes of turbidity in assembly of MT proteins over 15 minutes and disassembly after the addition of 1 mM calcium (indicated by arrow) with (2.5  $\mu$ M, 5.0  $\mu$ M, 10.0  $\mu$ M) or without  $\alpha$ B-crystallin. (D) The ratio of the attained polymerization as a mean value at 14–15 minutes after 113  $\mu$ M calcium addition with  $\alpha$ B-crystallin (10  $\mu$ M) was significantly higher than that without  $\alpha$ B-crystallin. Values are means  $\pm$  s.d. ( $n=6$ , \*\*significantly different at  $P<0.01$ ).

chaperone bed for denatured tubulin dimers and/or other substrates. Taken together, there is a possibility that one important role of  $\alpha$ B-crystallin is to protect cytoskeletal proteins from denaturation while keeping monomers close to the polymeric cytoskeletons, with the transformation between the two forms being dynamically regulated (Goldman et al., 1999; Kirschner, 1980; Mitchison and Kirschner, 1984) under both normal and stressed conditions.

Otherwise, it seems that the possible function additive above discussion might relate closely to a maintenance of tensegrity of cytoskeletons (Ingber, 1993) against long-lasting tonic contraction. Because all sHSPs are highly expressed in muscle cells, especially in heart (Dubin et al., 1989) and in slow skeletal muscle (fiber-type-dependent expression) (Atomi et al., 2000), the function of these tissues might be related to tonic contraction, to be maintained with endlessly energy-consuming fashion. In addition, a close correlation has been reported between oxidative metabolism and the expression level of  $\alpha$ B-crystallin in various cells in rat tissues (Iwaki et al., 1990).

Three cytoskeleton components (fibrous actin, MT and IF) are basically independently regulated but affect each other with different tensile and dynamic properties. Vimentin colocalization with MT networks has been reported in most cultured cells (Gyoeva and Gelfand, 1991). In our study, colocalization of MTs and vimentin was ascertained in L6E9 and C6 cells (data not shown). Recently, some specific proteins were identified that connect actin and MTs (Karakesisoglou et al., 2000; Leung et al., 1999) or MTs and IFs (Liao and Gundersen, 1998). Thus, two or three cytoskeletal systems might work together in living cells.  $\alpha$ B-Crystallin might work as a chaperone for both the IF (Nicholl and Quinlan, 1994; Perng et al., 1999; Vicart et al., 1998) and the MT systems, because they align laterally in most cells. The maintenance of cytoskeleton dynamics, as well as the tensegrity model of Ingber (Ingber, 1993), might need sHSPs.

After nocodazole treatment, it was clearly observed that more MTs remained in both C6 normal and C6SE cells than in C6AS cells. However, after 2 hours, MTs in both C6SE and C6AS cells completely depolymerized. In other words,  $\alpha$ B-crystallin does not completely inhibit MT depolymerization but it seems to promote resistance to MT depolymerization in cells. We used podophyllotoxin for in vitro MT depolymerization because nocodazole had measurable absorbance in our condition. Both nocodazole and podophyllotoxin are vinca alkaloids and bind the same site of tubulin (Hoebeke et al., 1976; Luduena and Roach, 1981) and depolymerize MTs in the same manner.  $\alpha$ B-Crystallin also had significant protective effects on MT disassembly by not only podophyllotoxin but also  $\text{Ca}^{2+}$  (at 113  $\mu$ M) in vitro in this study. MTs are stabilized with MAPs and this stabilization resulted in the terminal amino acid modification to Glu (Cook et al., 1998) in some cell types (Gundersen et al., 1989). However, it has been reported that various factors, such as divalent cations, pH, magnesium, phosphorylation and kinase activation, influence tubulin and MT conditions. Further precise mechanisms of  $\alpha$ B-crystallin for stabilizing MT need to be resolved in future.

The present study has shown a close relationship between  $\alpha$ B-crystallin and MTs, in cells and in vitro, and a resistant effect of  $\alpha$ B-crystallin on nocodazole- and calcium-induced depolymerization of MT, both in cells and in vitro. This suggests that the role of  $\alpha$ B-crystallin for MTs might be that of a possible modulator for disassembly of MTs mediated by MAPs.

We thank T. Mitchison and R. I. Morimoto for helpful discussions. This study was supported in part by Grants in Aid of Scientific Research (C no. 12660254 and A no. 13898001) from the Japanese Ministry of Education, Culture, Sports, Science and Technology (MEXT), by JST (Japan Science and Technology Corporation)/RISTEX (Research Institute of Science and Technology for Society), and Funds for Basic Experiments Oriented to Space Station Utilization from ISAS: 'Ground Research Announcement for Space Utilization' promoted by the Japan Space Forum and 'Scientific Experiments Oriented to Mechanical Stimulus in Biology' from JPBSI.

## References

- Arai, H. and Atomi, Y. (1997). Chaperone activity of  $\alpha$ B-crystallin suppresses tubulin aggregation through complex formation. *Cell Struct. Funct.* **22**, 539–544.



- Atomi, Y., Yamada, S. and Nishida, T. (1991a). Early changes of  $\alpha$ B-crystallin mRNA in rat skeletal muscle to mechanical tension and denervation. *Biochem. Biophys. Res. Commun.* **181**, 1323-1330.
- Atomi, Y., Yamada, S., Strohmman, R. and Nonomura, Y. (1991b).  $\alpha$ B-crystallin in skeletal muscle: purification and localization. *J. Biochem.* **110**, 812-822.
- Atomi, Y., Toro, K., Masuda, T. and Hatta, H. (2000). Fiber-type-specific  $\alpha$ B-crystallin distribution and its shifts with T(3) and PTU treatments in rat hindlimb muscles. *J. Appl. Physiol.* **88**, 1355-1364.
- Bloemendal, H. (1977). The vertebrate eye lens. *Science* **197**, 127-138.
- Boelens, W. C., Croes, Y. and de Jong, W. W. (2001). Interaction between  $\alpha$ B-crystallin and the human 20S proteasomal subunit C8/ $\alpha$ 7. *Biochim. Biophys. Acta* **1544**, 311-319.
- Boyle, D. and Takemoto, L. (1994). Characterization of the  $\alpha$ - $\gamma$  and  $\alpha$ - $\beta$  complex: evidence for an in vivo functional role of  $\alpha$ -crystallin as a molecular chaperone. *Exp. Eye Res.* **58**, 9-15.
- Carver, J. A., Lindner, R. A., Lyon, C., Canet, D., Hernandez, H., Dobson, C. M. and Redfield, C. (2002). The interaction of the molecular chaperone  $\alpha$ -crystallin with unfolding  $\alpha$ -lactalbumin: a structural and kinetic spectroscopic study. *J. Mol. Biol.* **318**, 815-827.
- Cook, T. A., Nagasaki, T. and Gundersen, G. G. (1998). Rho guanine triphosphatase mediates the selective stabilization of microtubules induced by lysophosphatidic acid. *J. Cell Biol.* **141**, 175-185.
- Cooper, P. N., Jackson, M., Lennox, G., Lowe, J. and Mann, D. M. (1995). Tau, ubiquitin, and  $\alpha$ B-crystallin immunohistochemistry define the principal causes of degenerative frontotemporal dementia. *Arch. Neurol.* **52**, 1011-1015.
- Danowski, B. A., Imanaka-Yoshida, K., Sanger, J. M. and Sanger, J. W. (1992). Costameres are sites of force transmission to the substratum in adult rat cardiomyocytes. *J. Cell Biol.* **118**, 1411-1420.
- de Jong, W. W., Terwindt, E. C. and Groenewoud, G. (1976). Subunit compositions of vertebrate  $\alpha$ -crystallins. *Comp. Biochem. Physiol. B* **55**, 49-56.
- Djabali, K., de Nechaud, B., Landon, F. and Portier, M. M. (1997).  $\alpha$ B-Crystallin interacts with intermediate filaments in response to stress. *J. Cell Sci.* **110**, 2759-2769.
- Dou, F., Netzer, W. J., Tanemura, K., Li, F., Hartl, F. U., Takashima, A., Gouras, G. K., Greengard, P. and Xu, H. (2003). Chaperones increase association of tau protein with microtubules. *Proc. Natl. Acad. Sci. USA* **100**, 721-726.
- Dubin, R. A., Wawrousek, E. F. and Piatigorsky, J. (1989). Expression of the murine  $\alpha$ B-crystallin gene is not restricted to the lens. *Mol. Cell. Biol.* **9**, 1083-1091.
- Goldman, R. D., Chou, Y. H., Prahlad, V. and Yoon, M. (1999). Intermediate filaments: dynamic processes regulating their assembly, motility, and interactions with other cytoskeletal systems. *FASEB J.* **13** (Suppl. 2), S261-S265.
- Gundersen, G. G., Khawaja, S. and Bulinski, J. C. (1987). Postpolymerization detyrosination of  $\alpha$ -tubulin: a mechanism for subcellular differentiation of microtubules. *J. Cell Biol.* **105**, 251-264.
- Gundersen, G. G., Khawaja, S. and Bulinski, J. C. (1989). Generation of a stable, posttranslationally modified microtubule array is an early event in myogenic differentiation. *J. Cell Biol.* **109**, 2275-2288.
- Gyoeva, F. K. and Gelfand, V. I. (1991). Coalignment of vimentin intermediate filaments with microtubules depends on kinesin. *Nature* **353**, 445-448.
- Haley, D. A., Horwitz, J. and Stewart, P. L. (1998). The small heat-shock protein,  $\alpha$ B-crystallin, has a variable quaternary structure. *J. Mol. Biol.* **277**, 27-35.
- Hoebek, J., van Nijen, G. and de Brabander, M. (1976). Interaction of oncodazole (R 17934), a new antitumoral drug, with rat brain tubulin. *Biochem. Biophys. Res. Commun.* **69**, 319-324.
- Ingber, D. E. (1993). Cellular tensegrity: defining new rules of biological design that govern the cytoskeleton. *J. Cell Sci.* **104**, 613-627.
- Iwaki, T., Kume-Iwaki, A. and Goldman, J. E. (1990). Cellular distribution of  $\alpha$ B-crystallin in non-lenticular tissues. *J. Histochem. Cytochem.* **38**, 31-39.
- Iwaki, T., Iwaki, A., Tateishi, J. and Goldman, J. E. (1994). Sense and antisense modification of glial  $\alpha$ B-crystallin production results in alterations of stress fiber formation and thermoresistance. *J. Cell Biol.* **125**, 1385-1393.
- Karakesisoglou, I., Yang, Y. and Fuchs, E. (2000). An epidermal plakins that integrates actin and microtubule networks at cellular junctions. *J. Cell Biol.* **149**, 195-208.
- Katayama, E. (1989). The effects of various nucleotides on the structure of actin-attached myosin subfragment-1 studied by quick-freeze deep-etch electron microscopy. *J. Biochem.* **106**, 751-770.
- Kato, K., Ito, H., Inaguma, Y., Okamoto, K. and Saga, S. (1996). Synthesis and accumulation of  $\alpha$ B-crystallin in C6 glioma cells is induced by agents that promote the disassembly of microtubules. *J. Biol. Chem.* **271**, 26989-26994.
- Kirschner, M. W. (1980). Implications of treadmilling for the stability and polarity of actin and tubulin polymers in vivo. *J. Cell Biol.* **86**, 330-334.
- Klemenz, R., Andres, A. C., Frohli, E., Schafer, R. and Aoyama, A. (1993). Expression of the murine small heat shock proteins HSP 25 and  $\alpha$ B crystallin in the absence of stress. *J. Cell Biol.* **120**, 639-645.
- Lee, J.-S., Samejima, T., Liao, J.-H., Wu, S.-H. and Chiou, S.-H. (1998). Physiological role of the association complexes of  $\alpha$ -crystallin and its substrates on the chaperone activity. *Biochem. Biophys. Res. Commun.* **244**, 379-383.
- Leung, C. L., Sun, D., Zheng, M., Knowles, D. R. and Liem, R. K. (1999). Microtubule actin cross-linking factor (MACF): a hybrid of dystonin and dystrophin that can interact with the actin and microtubule cytoskeletons. *J. Cell Biol.* **147**, 1275-1286.
- Liao, G. and Gundersen, G. G. (1998). Kinesin is a candidate for cross-bridging microtubules and intermediate filaments. Selective binding of kinesin to detyrosinated tubulin and vimentin. *J. Biol. Chem.* **273**, 9797-9803.
- Lowe, J., Landon, M., Pike, I., Spendlove, I., McDermott, H. and Mayer, R. J. (1990). Dementia with  $\beta$ -amyloid deposition: involvement of  $\alpha$ B-crystallin supports two main diseases. *Lancet* **336**, 515-516.
- Lowe, J., McDermott, H., Pike, I., Spendlove, I., Landon, M. and Mayer, R. J. (1992).  $\alpha$ B crystallin expression in non-lenticular tissues and selective presence in ubiquitinated inclusion bodies in human disease. *J. Pathol.* **166**, 61-68.
- Ludueno, R. F. and Roach, M. C. (1981). Interaction of tubulin with drugs and alkylating agents. 2. Effects of colchicine, podophyllotoxin, and vinblastine on the alkylation of tubulin. *Biochemistry* **20**, 4444-4450.
- Maccioni, R. B. (1983). Microtubule assembly affected by the presence of denatured tubulin. *Biochem. Biophys. Res. Commun.* **110**, 463-469.
- Maccioni, R. B. and Cambiazo, V. (1995). Role of microtubule-associated proteins in the control of microtubule assembly. *Physiol. Rev.* **75**, 835-864.
- Mitchison, T. and Kirschner, M. (1984). Dynamic instability of microtubule growth. *Nature* **312**, 237-242.
- Nicholl, I. D. and Quinlan, R. A. (1994). Chaperon activity of  $\alpha$ -crystallin modulates intermediate filament assembly. *EMBO J.* **13**, 945-953.
- O'Brien, E. T., Salmon, E. D. and Erickson, H. P. (1997). How calcium causes microtubule depolymerization. *Cell Motil. Cytoskeleton* **36**, 125-135.
- Pachter, J. S., Yen, T. J. and Cleveland, D. W. (1987). Autoregulation of tubulin expression is achieved through specific degradation of polysomal tubulin mRNAs. *Cell* **51**, 283-292.
- Perng, M. D., Cairns, L., van den, I. P., Prescott, A., Hutcheson, A. M. and Quinlan, R. A. (1999). Intermediate filament interactions can be altered by HSP27 and  $\alpha$ B-crystallin. *J. Cell Sci.* **112**, 2099-2112.
- Quax-Jeuken, Y., Quax, W., van Rens, G., Khan, P. M. and Bloemendal, H. (1985). Complete structure of the  $\alpha$ B-crystallin gene: conservation of the exon-intron distribution in the two nonlinked alpha-crystallin genes. *Proc. Natl. Acad. Sci. USA* **82**, 5819-5823.
- Quinlan, R. A. (2002). Cytoskeletal competence requires protein chaperones. *Prog. Mol. Subcell. Biol.* **28**, 219-233.
- Shelanski, M. L., Gaskin, F. and Cantor, C. R. (1973). Microtubule assembly in the absence of added nucleotides. *Proc. Natl. Acad. Sci. USA* **70**, 765-768.
- Terada, S., Kinjo, M. and Hirokawa, N. (2000). Oligomeric tubulin in large transporting complex is transported via kinesin in squid giant axons. *Cell* **103**, 141-155.
- Vallee, R. B. (1982). A Taxol-dependent procedure for the isolation of microtubules and microtubule-associated proteins (MAPs). *J. Cell Biol.* **92**, 435-442.
- Vicart, P., Caron, A., Guicheney, P., Li, Z., Prevost, M. C., Faure, A., Chateau, D., Chapon, F., Tome, F., Dupret, J. M. et al. (1998). A missense mutation in the  $\alpha$ B-crystallin chaperone gene causes a desmin-related myopathy. *Nat. Genet.* **20**, 92-95.
- Wang, K. and Spector, A. (1996).  $\alpha$ -Crystallin stabilizes actin filaments and prevents cytochalasin-induced depolymerization in a phosphorylation-dependent manner. *Eur. J. Biochem.* **242**, 56-66.
- Waterman-Storer, C. M. and Salmon, E. D. (1997). Actomyosin-based retrograde flow of microtubules in the lamella of migrating epithelial cells influences microtubule dynamic instability and turnover and is associated with microtubule breakage and treadmilling. *J. Cell Biol.* **139**, 417-434.
- Weingarten, M. D., Lockwood, A. H., Hwo, S. Y. and Kirschner, M. W. (1975). A protein factor essential for microtubule assembly. *Proc. Natl. Acad. Sci. USA* **72**, 1858-1862.
- Yaffe, M. B., Farr, G. W., Miklos, D., Horwich, A. L., Sternlicht, M. L. and Sternlicht, H. (1992). TCP1 complex is a molecular chaperone in tubulin biogenesis. *Nature* **358**, 245-248.
- Yen, T. J., Machlin, P. S. and Cleveland, D. W. (1988). Autoregulated instability of  $\beta$ -tubulin mRNAs by recognition of the nascent amino terminus of  $\beta$ -tubulin. *Nature* **334**, 580-585.
